# Supplementary material for: Review of Vaccination Recommendations in Guidelines for Non-Communicable Diseases with Highest Global Disease Burden among Adults 75 Years Old and Above
Source: MDPI journal article supplement (doi:10.3390/vaccines11061076), 2023-06-08
Supplement: s1 [file s1]

## Supplementary Materials

### Cardiac-related diseases

**Table S1.** Summary of vaccination recommendation for IHD.

| Name of guidelines<br>(Year of guideline publication),<br>Country of origin of the guideline                                                                                      | Name of recommended vaccines,<br>Strength of recommendation (strong/moderate/weak/not stated) | Details of recommendation for each vaccine                                      |                                                                               |                                                                                              |
|-----------------------------------------------------------------------------------------------------------------------------------------------------------------------------------|-----------------------------------------------------------------------------------------------|---------------------------------------------------------------------------------|-------------------------------------------------------------------------------|----------------------------------------------------------------------------------------------|
|                                                                                                                                                                                   |                                                                                               | Specific indications (age, severity of disease, disease subgroup)               | Specific contraindications and harms (side effects)                           | Vaccine administration (timing, route, dosage) and storage details                           |
| ACCF/AHA/American College of Physicians (ACP)/AATS/PCNA/SCAI/STS: Guideline for the diagnosis and management of patients with stable ischemic heart disease (2012), United States | Inactivated Influenza vaccine,<br>Strength of recommendation: Strong                          | Stable Ischemic Heart Disease patients $\geq 65$ years old                      | Contraindications: Not mentioned<br>Harms: Pain and myalgia at injection site | Timing: Annual<br>Route: Intramuscular<br>Dosage: Standard dose<br>Storage: Not mentioned    |
| AHA: A scientific statement for secondary prevention after coronary artery bypass graft (2015), United States                                                                     | Influenza vaccine,<br>Strength of recommendation: Strong                                      | All CABG patients, unless contraindications exist                               | Not mentioned                                                                 | Timing: Uncertain<br>Route: Not mentioned<br>Dosage: Not mentioned<br>Storage: Not mentioned |
| AHA: Scientific statement on self-care for the prevention and management of cardiovascular disease and stroke (2017), United States                                               | Influenza vaccine,<br>Strength of recommendation: Not stated                                  | Not mentioned                                                                   | Not mentioned                                                                 | Timing: Annual<br>Route: Not mentioned<br>Dosage: Not mentioned<br>Storage: Not mentioned    |
| European Society of Cardiology (ESC): Guidelines on chronic coronary syndromes (2019), Europe                                                                                     | Influenza vaccine,<br>Strength of recommendation: Strong                                      | Chronic Coronary Syndrome patients especially in the elderly (age 65 and above) | Not mentioned                                                                 | Timing: Annual<br>Route: Not mentioned<br>Dosage: Not mentioned<br>Storage: Not mentioned    |
| European Society of Cardiology (ESC): Guidelines on cardiovascular disease prevention in clinical practice (2021), Europe                                                         | Influenza vaccine,<br>Strength of recommendation: Not stated                                  | Not mentioned                                                                   | Not mentioned                                                                 | Not mentioned                                                                                |

|                                                                                                                                                                           |                                                                 |                                                             |               |                                                                                           |
|---------------------------------------------------------------------------------------------------------------------------------------------------------------------------|-----------------------------------------------------------------|-------------------------------------------------------------|---------------|-------------------------------------------------------------------------------------------|
| NHFA and CSANZ:<br>Reducing risk in heart disease – An expert guide to clinical practice for secondary prevention of coronary heart disease (2012), Australia-New Zealand | Influenza vaccine,<br>Strength of recommendation: Not stated    | Everyone with Coronary Heart Disease unless contraindicated | Not mentioned | Timing: Annual<br>Route: Not mentioned<br>Dosage: Not mentioned<br>Storage: Not mentioned |
|                                                                                                                                                                           | Pneumococcal vaccine,<br>Strength of recommendation: Not stated | Everyone with Coronary Heart Disease unless contraindicated | Not mentioned | Not mentioned                                                                             |

**Table S2.** Summary of vaccination recommendation for Hypertensive heart disease.

| Name of guidelines<br>( Year of guideline publication),<br>Country of origin of the guideline                                                                                                                        | Name of recommended vaccines,<br>Strength of recommendation (strong/moderate/weak/not stated) | Details of recommendation for each vaccine                        |                                                     |                                                                                                               |
|----------------------------------------------------------------------------------------------------------------------------------------------------------------------------------------------------------------------|-----------------------------------------------------------------------------------------------|-------------------------------------------------------------------|-----------------------------------------------------|---------------------------------------------------------------------------------------------------------------|
|                                                                                                                                                                                                                      |                                                                                               | Specific indications (age, severity of disease, disease subgroup) | Specific contraindications and harms (side effects) | Vaccine administration (timing, route, dosage) and storage details                                            |
| CCS: Society guidelines for the management of heart failure, comprehensive update (2017), Canada                                                                                                                     | Influenza vaccine,<br>Strength of recommendation: Not stated                                  | Patients at high risk for developing Heart Failure                | Not mentioned                                       | Not mentioned                                                                                                 |
|                                                                                                                                                                                                                      | Pneumococcal pneumonia vaccine,<br>Strength of recommendation: Not stated                     |                                                                   | Not mentioned                                       | Not mentioned                                                                                                 |
| AHA:<br>Scientific statement on contributory risk and management of comorbidities of hypertension, obesity, diabetes mellitus, hyperlipidemia, and metabolic syndrome in chronic heart failure (2016), United States | Flu vaccine,<br>Strength of recommendation: Not stated                                        | Heart Failure patients                                            | Not mentioned                                       | Not mentioned                                                                                                 |
|                                                                                                                                                                                                                      | Pneumonia vaccine,<br>Strength of recommendation: Not stated                                  |                                                                   | Not mentioned                                       | Not mentioned                                                                                                 |
| AHA/HFSA: Scientific statement on heart failure management in skilled nursing facilities (2015), United States                                                                                                       | Influenza vaccine,<br>Strength of recommendation: Not stated                                  | Patients with Heart Failure                                       | Not mentioned                                       | Timing: Every fall<br>Route: Not mentioned<br>Dosage: Not mentioned<br>Storage: Not mentioned                 |
|                                                                                                                                                                                                                      | Pneumococcal vaccine polyvalent,<br>Strength of recommendation: Not stated                    |                                                                   | Not mentioned                                       | Timing: 1 dose at any age and repeat at age ≥65 years if prior dose was given before age 65 years and 5 years |

|                                                                                                                            |                                                                                                                                   |                                                                                            |               |                                                                                                             |
|----------------------------------------------------------------------------------------------------------------------------|-----------------------------------------------------------------------------------------------------------------------------------|--------------------------------------------------------------------------------------------|---------------|-------------------------------------------------------------------------------------------------------------|
|                                                                                                                            |                                                                                                                                   |                                                                                            |               | has elapsed since first dose<br><br>Route: Not mentioned<br>Dosage: Not mentioned<br>Storage: Not mentioned |
| HFSA: Heart failure guidelines (2010), United States                                                                       | Influenza vaccine, Strength of recommendation: Recommended (Part of routine care<br>Exceptions to therapy should be minimized)    | All patients with Heart Failure with no known contraindications                            | Not mentioned | Timing: Annual<br>Route: Not mentioned<br>Dosage: Not mentioned<br>Storage: Not mentioned                   |
|                                                                                                                            | Pneumococcal vaccine, Strength of recommendation: Recommended (Part of routine care<br>Exceptions to therapy should be minimized) |                                                                                            | Not mentioned | Not mentioned                                                                                               |
| AHA: Scientific statement on promoting self-care in persons with heart failure (2009), United States                       | Flu vaccine, Strength of recommendation: Not stated                                                                               | Patients with Heart Failure                                                                | Not mentioned | Timing: Annual<br>Route: Not mentioned<br>Dosage: Not mentioned<br>Storage: Not mentioned                   |
|                                                                                                                            | Pneumococcal vaccine, Strength of recommendation: Not stated                                                                      | Persons over the age of 65 years unless contraindicated                                    | Not mentioned | Not mentioned                                                                                               |
| ESC: Guidelines for the diagnosis and treatment of acute and chronic heart failure (2021), Europe                          | Influenza vaccine, Strength of recommendation: Not stated                                                                         | Patients with Heart Failure                                                                | Not mentioned | Not mentioned                                                                                               |
|                                                                                                                            | Pneumococcal vaccine, Strength of recommendation: Not stated                                                                      |                                                                                            | Not mentioned | Not mentioned                                                                                               |
|                                                                                                                            | COVID-19 vaccine, Strength of recommendation: Not stated                                                                          |                                                                                            | Not mentioned | Not mentioned                                                                                               |
| European Society of Cardiology (ESC): Guidelines on diagnosis and management of hypertrophic cardiomyopathy (2014), Europe | Influenza vaccine, Strength of recommendation: Not stated                                                                         | Symptomatic patients with hypertrophic cardiomyopathy, in the absence of contraindications | Not mentioned | Timing: Annual<br>Route: Not mentioned<br>Dosage: Not mentioned<br>Storage: Not mentioned                   |
| NICE: Guideline on chronic heart failure in adults – Diagnosis and                                                         | Influenza vaccine, Strength of recommendation: Not stated                                                                         | Patients with Heart Failure                                                                | Not mentioned | Timing: Annual<br>Route: Not mentioned<br>Dosage: Not                                                       |

|                                                                                                                                                                                                                                                             |                                                                                      |                                           |               |                                                                                                    |
|-------------------------------------------------------------------------------------------------------------------------------------------------------------------------------------------------------------------------------------------------------------|--------------------------------------------------------------------------------------|-------------------------------------------|---------------|----------------------------------------------------------------------------------------------------|
| management (2018),<br>United Kingdom                                                                                                                                                                                                                        |                                                                                      |                                           |               | mentioned<br>Storage: Not<br>mentioned                                                             |
| Scottish Intercollegiate<br>Guidelines Network<br>(SIGN): Management of<br>chronic heart failure – A<br>national clinical<br>guideline (2016), United<br>Kingdom                                                                                            | Influenza vaccine,<br>Strength of<br>recommendation:<br>Recommended best practice    | Patients with<br>Chronic Heart<br>Failure | Not mentioned | Timing: Annual<br>Route: Not<br>mentioned<br>Dosage: Not<br>mentioned<br>Storage: Not<br>mentioned |
|                                                                                                                                                                                                                                                             | Pneumococcal vaccine,<br>Strength of<br>recommendation:<br>Recommended best practice |                                           | Not mentioned | Not mentioned                                                                                      |
| National Heart<br>Foundation of Australia<br>(NHFA) and Cardiac<br>Society for Australia and<br>New Zealand (CSANZ):<br>Guidelines for the<br>prevention, detection,<br>and management of<br>heart failure in Australia<br>(2018), Australia-New<br>Zealand | Influenza vaccine,<br>Strength of<br>recommendation: Not stated                      | Patients with Heart<br>Failure            | Not mentioned | Not mentioned                                                                                      |
|                                                                                                                                                                                                                                                             | Pneumococcal vaccine,<br>Strength of<br>recommendation: Not stated                   |                                           | Not mentioned | Not mentioned                                                                                      |

**Table S3.** Summary of vaccination recommendation for aAtrial Fibrillation and Flutter.

| Name of guidelines<br>( Year of guideline<br>publication),<br>Country of origin of the<br>guideline                                                       | Name of recommended<br>vaccines,<br>Strength of recommendation<br>(strong/moderate/weak/not<br>stated) | Details of recommendation for each vaccine                                       |                                                              |                                                                                |
|-----------------------------------------------------------------------------------------------------------------------------------------------------------|--------------------------------------------------------------------------------------------------------|----------------------------------------------------------------------------------|--------------------------------------------------------------|--------------------------------------------------------------------------------|
|                                                                                                                                                           |                                                                                                        | Specific<br>indications<br>(age, severity<br>of disease,<br>disease<br>subgroup) | Specific<br>contraindications<br>and harms (side<br>effects) | Vaccine<br>administration<br>(timing, route,<br>dosage) and<br>storage details |
| AHA/ACC/Heart Rhythm<br>Society (HRS): Guideline<br>for the management of<br>patient with atrial<br>fibrillation, focused update<br>(2019), United States | Influenza,<br>Strength of recommendation:<br>Not stated                                                | Patients with<br>VHD                                                             | Not mentioned                                                | Not mentioned                                                                  |
|                                                                                                                                                           | Pneumococcal,<br>Strength of recommendation:<br>Not stated                                             |                                                                                  | Not mentioned                                                | Not mentioned                                                                  |

#### Respiratory- related diseases

**Table S4.** Summary of vaccination recommendation for COPD.

|  |  |                                            |
|--|--|--------------------------------------------|
|  |  | Details of recommendation for each vaccine |
|--|--|--------------------------------------------|

| Name of guidelines<br>( Year of guideline publication),<br>Country of origin of the guideline                                                                                                          | Name of recommended vaccines,<br>Strength of recommendation<br>(strong/moderate/weak/not stated)          | Specific indications (age, severity of disease, disease subgroup)                                                   | Specific contraindications and harms (side effects) | Vaccine administration (timing, route, dosage) and storage details                                            |
|--------------------------------------------------------------------------------------------------------------------------------------------------------------------------------------------------------|-----------------------------------------------------------------------------------------------------------|---------------------------------------------------------------------------------------------------------------------|-----------------------------------------------------|---------------------------------------------------------------------------------------------------------------|
| Global Initiative for Chronic Obstructive Lung Disease (GOLD):<br>Global strategy for the diagnosis, management, and prevention of chronic obstructive pulmonary disease, update (2022), International | Influenza vaccine (either killed or live inactivated vaccines),<br>Strength of recommendation: Not stated | All patients with COPD                                                                                              | Not mentioned                                       | Not mentioned                                                                                                 |
|                                                                                                                                                                                                        | SARS-Cov-2 (COVID-19),<br>Strength of recommendation: Not stated                                          | All patients with COPD                                                                                              | Not mentioned                                       | Timing: Follow national guidelines<br>Route: Not mentioned<br>Dosage: Not mentioned<br>Storage: Not mentioned |
|                                                                                                                                                                                                        | 23-valent pneumococcal polysaccharide vaccine (PPSV23),<br>Strength of recommendation: Not stated         | COPD patients <65 years old, and patients ≥65 years old                                                             | Not mentioned                                       | Not mentioned                                                                                                 |
|                                                                                                                                                                                                        | 13-valent conjugated pneumococcal vaccine (PCV13),<br>Strength of recommendation: Not stated              | General population ≥65 years old                                                                                    | Not mentioned                                       | Not mentioned                                                                                                 |
|                                                                                                                                                                                                        | Tdap (dTAP/dTPa),<br>Strength of recommendation: Not stated                                               | For those who were not vaccinated in adolescence                                                                    | Not mentioned                                       | Not mentioned                                                                                                 |
|                                                                                                                                                                                                        | Zoster,<br>Strength of recommendation: Not stated                                                         | Adults with COPD ≥50 years old                                                                                      | Not mentioned                                       | Not mentioned                                                                                                 |
| BC Guidelines: Chronic obstructive pulmonary disease (COPD) –<br>Diagnosis and management (2017, updated 2020), Canada                                                                                 | Influenza vaccine,<br>Strength of recommendation: Not stated                                              | All patients with COPD                                                                                              | Not mentioned                                       | Timing: Annual<br>Route: Not mentioned<br>Dosage: Not mentioned<br>Storage: Not mentioned                     |
|                                                                                                                                                                                                        | Pneumococcal polysaccharide vaccine,<br>Strength of recommendation: Not stated                            | Adults with COPD especially those with specific comorbidities or undergoing certain treatments (e.g., chemotherapy) | Not mentioned                                       | Not mentioned                                                                                                 |

|                                                                                                                                                                                                                |                                                                  |                                                                                            |                 |               |                                                                                           |
|----------------------------------------------------------------------------------------------------------------------------------------------------------------------------------------------------------------|------------------------------------------------------------------|--------------------------------------------------------------------------------------------|-----------------|---------------|-------------------------------------------------------------------------------------------|
| American College of Chest Physicians (CHEST) and CTS: Guideline for the prevention of acute exacerbations of COPD (2015), Canada and United States                                                             | Influenza vaccine, Strength of recommendation: Strong            | For all persons aged ≥6 months who do not have contraindications, especially COPD patients |                 | Not mentioned | Timing: Annual<br>Route: Not mentioned<br>Dosage: Not mentioned<br>Storage: Not mentioned |
|                                                                                                                                                                                                                | 23-valent pneumococcal vaccine, Strength of recommendation: Weak | All adults aged ≥65 years and in those aged 19-64 years with COPD                          |                 | Not mentioned | Not mentioned                                                                             |
| American Thoracic Society (ATS): An official workshop report on challenges in the implementation of chronic obstructive pulmonary disease guidelines in low- and middle-income countries (2021), United States | Influenza vaccine, Strength of recommendation: Not stated        | All patients with COPD                                                                     |                 | Not mentioned | Not mentioned                                                                             |
| Department of Veterans Affairs (VA)/Department of Defense (DoD): Clinical practice guideline for the management of chronic obstructive pulmonary disease (2021), United States                                 | Influenza vaccine, Strength of recommendation: Weak              | All patients with COPD                                                                     |                 | Not mentioned | Not mentioned                                                                             |
|                                                                                                                                                                                                                | Pneumococcal vaccine, Strength of recommendation: Weak           | All patients with COPD                                                                     |                 | Not mentioned | Not mentioned                                                                             |
| NICE: Guideline on chronic obstructive pulmonary disease in over 16s – Diagnosis and management (2018, updated 2019), United Kingdom                                                                           | Influenza vaccine, Strength of recommendation: Not stated        | All patients with COPD                                                                     |                 | Not mentioned | Timing: Annual<br>Route: Not mentioned<br>Dosage: Not mentioned<br>Storage: Not mentioned |
|                                                                                                                                                                                                                | Pneumococcal vaccine, Strength of recommendation: Not stated     | All patients with COPD                                                                     |                 | Not mentioned | Not mentioned                                                                             |
| Lung Foundation Australia (LFA) and Thoracic Society of Australia and New Zealand (TSANZ): The COPD-X plan – Australian and New Zealand guidelines for the management of chronic obstructive pulmonary disease | Influenza vaccine, Strength of recommendation: Strong            | All patients with COPD                                                                     |                 | Not mentioned | Timing: Annual<br>Route: Not mentioned<br>Dosage: Not mentioned<br>Storage: Not mentioned |
|                                                                                                                                                                                                                | Pneumococcal vaccine (23vPPV), Strength of                       | Not at increased risk of IPD*,                                                             | Non-indigenous: | Not mentioned | Timing:<br>-Initial dose: at 65 years old<br>-First                                       |

|                               |                            |                                                                                      |                               |  |                                                                                                                                                                                                                                                                  |
|-------------------------------|----------------------------|--------------------------------------------------------------------------------------|-------------------------------|--|------------------------------------------------------------------------------------------------------------------------------------------------------------------------------------------------------------------------------------------------------------------|
| (2021), Australia-New Zealand | recommendation: Not stated | non-smoker                                                                           |                               |  | revaccination: Nil<br>-Second revaccination: Nil<br>Route: Not mentioned<br>Dosage: Not mentioned<br>Storage: Not mentioned                                                                                                                                      |
|                               |                            |                                                                                      | Indigenous:                   |  | Timing:<br>-Initial dose: At 50 years old<br>-First revaccination: 5 years after first dose<br>- Second revaccination: Nil<br>Route: Not mentioned<br>Dosage: Not mentioned<br>Storage: Not mentioned                                                            |
|                               |                            | Smokers, newly diagnosed COPD, existing COPD, who have never received age-based dose | Non-indigenous: <65 years old |  | Timing:<br>-Initial dose: At diagnosis<br>-First revaccination: 5 years after first dose<br>- Second revaccination: at 65 years old or 5 years after second dose (whichever is later)<br>Route: Not mentioned<br>Dosage: Not mentioned<br>Storage: Not mentioned |
|                               |                            |                                                                                      | Indigenous: <50 years old     |  | Timing:<br>-Initial dose: At diagnosis<br>-First revaccination: 5 years after first dose<br>- Second                                                                                                                                                             |
|                               |                            |                                                                                      |                               |  |                                                                                                                                                                                                                                                                  |
|                               |                            |                                                                                      |                               |  |                                                                                                                                                                                                                                                                  |

|  |  |                                                                                        |                               |  |                                                                                                                                                                                           |
|--|--|----------------------------------------------------------------------------------------|-------------------------------|--|-------------------------------------------------------------------------------------------------------------------------------------------------------------------------------------------|
|  |  |                                                                                        |                               |  | revaccination: at 50 years old or 5 years after second dose (whichever is later)<br>Route: Not mentioned<br>Dosage: Not mentioned<br>Storage: Not mentioned                               |
|  |  | Smokers, newly diagnosed COPD, existing COPD, who have already received age-based dose | Non-indigenous: ≥65 years old |  | Timing:<br>-Initial dose: Nil<br>-First revaccination: 5 years after first dose<br>- Second revaccination: Nil<br>Route: Not mentioned<br>Dosage: Not mentioned<br>Storage: Not mentioned |
|  |  |                                                                                        | Indigenous: ≥50 years old     |  | Timing:<br>-Initial dose: Nil<br>-First revaccination: 5 years after first dose<br>- Second revaccination: Nil<br>Route: Not mentioned<br>Dosage: Not mentioned<br>Storage: Not mentioned |

**Table S5.** Summary of vaccination recommendation for Asthma.

| Name of guidelines<br>( Year of guideline publication),<br>Country of origin of the guideline | Name of recommended vaccines,<br>Strength of recommendation (strong/moderate/weak/not stated) | Details of recommendation for each vaccine                        |                                                     |                                                                    |
|-----------------------------------------------------------------------------------------------|-----------------------------------------------------------------------------------------------|-------------------------------------------------------------------|-----------------------------------------------------|--------------------------------------------------------------------|
|                                                                                               |                                                                                               | Specific indications (age, severity of disease, disease subgroup) | Specific contraindications and harms (side effects) | Vaccine administration (timing, route, dosage) and storage details |



|                                                                                                                                  |                                                                           |                                                                                                                                                                                                                                            |                                                                                                   |                                                                                                                                                                                                                                                                                                                                                                                                                                                                                                                                     |
|----------------------------------------------------------------------------------------------------------------------------------|---------------------------------------------------------------------------|--------------------------------------------------------------------------------------------------------------------------------------------------------------------------------------------------------------------------------------------|---------------------------------------------------------------------------------------------------|-------------------------------------------------------------------------------------------------------------------------------------------------------------------------------------------------------------------------------------------------------------------------------------------------------------------------------------------------------------------------------------------------------------------------------------------------------------------------------------------------------------------------------------|
| Global Initiative for Asthma (GINA): Global strategy for asthma management and prevention, update (2022), International          | COVID-19, Strength of recommendation: Not stated                          | Asthma                                                                                                                                                                                                                                     | Not mentioned                                                                                     | Not mentioned<br>Special consideration: first dose of biologic therapy and COVID-19 vaccine should not be given on the same day, to allow adverse effects of either to be more easily distinguished                                                                                                                                                                                                                                                                                                                                 |
|                                                                                                                                  | Influenza, Strength of recommendation: Not stated                         |                                                                                                                                                                                                                                            | Not mentioned                                                                                     | Timing: Annually<br>Route: Not mentioned<br>Dosage: Not mentioned<br>Storage: Not mentioned                                                                                                                                                                                                                                                                                                                                                                                                                                         |
|                                                                                                                                  | Pneumococcal, Strength of recommendation: Not stated                      |                                                                                                                                                                                                                                            | Not mentioned                                                                                     | Not mentioned                                                                                                                                                                                                                                                                                                                                                                                                                                                                                                                       |
| NHLBI and NAEPP: Expert panel report 3 – Guidelines for the diagnosis and management of asthma (2007), United States             | Inactivated influenza vaccination, Strength of recommendation: Not stated | Asthma (children more than 6 months of age and adults)                                                                                                                                                                                     | Not mentioned                                                                                     | Not mentioned<br>Special consideration: - Should not be given with the expectation that it will reduce either the frequency or severity of asthma exacerbations during the influenza season<br><br>- patients who have documented histories of anaphylactic reactions after ingestion of egg protein and documented evidence of current allergic sensitization to eggs (skin testing or in vitro antigen-specific IgE antibody testing), the risk/benefit ratio of administration of influenza vaccine should be reviewed carefully |
| National Asthma Council Australia (NACA): Australian asthma handbook (2022), Australia-New Zealand (2022), Australia-New Zealand | Influenza, Strength of recommendation: Not stated                         | - patients with severe asthma, defined as those who need frequent hospital visits and multiple medicines for asthma<br>- all adults ≥65 years<br>- patients with COPD<br>- pregnant women<br>- for any adult who wishes to avoid influenza | Contraindications: person is receiving high-dose oral steroid therapy<br><br>Harms: Not mentioned | Timing: Annually<br>Route: Not mentioned<br>Dosage: Not mentioned<br>Storage: Not mentioned                                                                                                                                                                                                                                                                                                                                                                                                                                         |
|                                                                                                                                  | Pneumococcal, Strength of recommendation: Not stated                      |                                                                                                                                                                                                                                            |                                                                                                   | Not mentioned                                                                                                                                                                                                                                                                                                                                                                                                                                                                                                                       |

## Gastrointestinal- related diseases

**Table S6.** Summary of vaccination recommendation for Cirrhosis and Other Chronic Liver Diseases.

| Name of guidelines<br>( Year of guideline<br>publication),<br>Country of origin of the<br>guideline                                                                                                                                                       | Name of recommended<br>vaccines,<br>Strength of recommendation<br>(strong/moderate/weak/not<br>stated) | Details of recommendation for each vaccine                                       |                                                              |                                                                                |
|-----------------------------------------------------------------------------------------------------------------------------------------------------------------------------------------------------------------------------------------------------------|--------------------------------------------------------------------------------------------------------|----------------------------------------------------------------------------------|--------------------------------------------------------------|--------------------------------------------------------------------------------|
|                                                                                                                                                                                                                                                           |                                                                                                        | Specific<br>indications<br>(age, severity<br>of disease,<br>disease<br>subgroup) | Specific<br>contraindications<br>and harms (side<br>effects) | Vaccine<br>administration<br>(timing, route,<br>dosage) and<br>storage details |
| American College of<br>Gastroenterology (ACG):<br>Acute-on-chronic liver failure<br>clinical guidelines (2022),<br>United States                                                                                                                          | Hepatitis A and B,<br>Strength of recommendation:<br>Not stated                                        | Patients with<br>Chronic Liver<br>Disease                                        | Not mentioned                                                | Not mentioned                                                                  |
| American College of<br>Gastroenterology (ACG):<br>Clinical guideline – Alcoholic<br>liver disease (2018), United<br>States                                                                                                                                | Hepatitis A and B,<br>Strength of recommendation:<br>Not stated                                        | Patients with<br>alcoholic<br>cirrhosis                                          | Not mentioned                                                | Not mentioned                                                                  |
|                                                                                                                                                                                                                                                           | Pneumococcal,<br>Strength of recommendation:<br>Not stated                                             |                                                                                  | Not mentioned                                                | Not mentioned                                                                  |
|                                                                                                                                                                                                                                                           | Influenza,<br>Strength of recommendation:<br>Not stated                                                |                                                                                  | Not mentioned                                                | Not mentioned                                                                  |
| American Association of<br>Clinical Endocrinology<br>(AACE): Clinical practice<br>guideline for the diagnosis<br>and management of<br>nonalcoholic fatty liver disease<br>in primary care and<br>endocrinology clinical settings<br>(2022), United States | Hepatitis A and B,<br>Strength of recommendation:<br>Not stated                                        | Persons With<br>Chronic Liver<br>Disease                                         | Not mentioned                                                | Not mentioned                                                                  |
|                                                                                                                                                                                                                                                           | Pneumococcal<br>polysaccharide vaccine<br>(PPSV23),<br>Strength of recommendation:<br>Not stated       |                                                                                  | Not mentioned                                                | Not mentioned                                                                  |
|                                                                                                                                                                                                                                                           | Influenza,<br>Strength of recommendation:<br>Not stated                                                |                                                                                  | Not mentioned                                                | Not mentioned                                                                  |
|                                                                                                                                                                                                                                                           | Tdap,<br>Strength of recommendation:<br>Not stated                                                     |                                                                                  | Not mentioned                                                | Not mentioned                                                                  |
|                                                                                                                                                                                                                                                           | Zoster,<br>Strength of recommendation:<br>Not stated                                                   |                                                                                  | Not mentioned                                                | Not mentioned                                                                  |
|                                                                                                                                                                                                                                                           | HPV,<br>Strength of recommendation:<br>Not stated                                                      |                                                                                  | Not mentioned                                                | Not mentioned                                                                  |
|                                                                                                                                                                                                                                                           | MMR,<br>Strength of recommendation:<br>Not stated                                                      |                                                                                  | Not mentioned                                                | Not mentioned                                                                  |

|  |                                                         |  |               |               |
|--|---------------------------------------------------------|--|---------------|---------------|
|  | Varicella,<br>Strength of recommendation:<br>Not stated |  | Not mentioned | Not mentioned |
|  | COVID-19,<br>Strength of recommendation:<br>Not stated  |  | Not mentioned | Not mentioned |

**Table S7.** Summary of vaccination recommendation for Colon and rectum cancer.

| Name of guidelines<br>( Year of guideline publication),<br>Country of origin of the guideline                         | Name of recommended vaccines,<br>Strength of recommendation (strong/moderate/weak/not stated) | Details of recommendation for each vaccine                           |                                                                                                                                                      |                                                                                                                                                                                                                                                                                                                                                               |
|-----------------------------------------------------------------------------------------------------------------------|-----------------------------------------------------------------------------------------------|----------------------------------------------------------------------|------------------------------------------------------------------------------------------------------------------------------------------------------|---------------------------------------------------------------------------------------------------------------------------------------------------------------------------------------------------------------------------------------------------------------------------------------------------------------------------------------------------------------|
|                                                                                                                       |                                                                                               | Specific indications<br>(age, severity of disease, disease subgroup) | Specific contraindications and harms (side effects)                                                                                                  | Vaccine administration (timing, route, dosage) and storage details                                                                                                                                                                                                                                                                                            |
| Indian Council of Medical Research (ICMR):<br>Consensus document for management of colorectal cancer (2014),<br>India | Influenza,<br>Strength of recommendation: Not stated                                          | Patients with Colorectal cancer undergoing chemotherapy              | Contraindications: Not mentioned<br>- Minor infection, in the absence of fever or systemic symptoms, is not itself a contraindication to vaccination | Timing: -should be given before chemotherapy<br>-for live attenuated influenza vaccine should be given at the end of chemotherapy cycle when the degree of immunosuppression is at its lowest<br>-Immunization should be postponed if a patient is suffering from an acute illness<br>Route: Not mentioned<br>Dosage: Not mentioned<br>Storage: Not mentioned |
|                                                                                                                       | Hepatitis B,<br>Strength of recommendation: Not stated                                        |                                                                      | Harms: immunological response may be impaired by chemotherapy                                                                                        | Timing: -should be given at the end of chemotherapy cycle when the degree of immunosuppression is at its lowest<br>-Immunization should be postponed if a patient is suffering from an acute illness<br>Route: Not mentioned<br>Dosage: Not mentioned<br>Storage: Not mentioned                                                                               |
|                                                                                                                       | MMR,<br>Strength of recommendation: Not stated                                                |                                                                      | Contraindications: -Never be administered to immunocompromised patients, including those receiving chemotherapy, within 6 months after               | Not mentioned<br>Special consideration: Immunization should be postponed if a patient is suffering from an acute illness                                                                                                                                                                                                                                      |

|  |                                                         |  |                                                                                                                                            |                                                                                                                          |
|--|---------------------------------------------------------|--|--------------------------------------------------------------------------------------------------------------------------------------------|--------------------------------------------------------------------------------------------------------------------------|
|  | BCG,<br>Strength of recommendation: Not stated          |  | receiving chemotherapy<br>- Minor infection, in the absence of fever or systemic symptoms, is not itself a contraindication to vaccination | Not mentioned<br>Special consideration: Immunization should be postponed if a patient is suffering from an acute illness |
|  | Yellow Fever,<br>Strength of recommendation: Not stated |  | Harms: Not mentioned                                                                                                                       | Not mentioned<br>Special consideration: Immunization should be postponed if a patient is suffering from an acute illness |

**Table S8.** Summary of vaccination recommendation for Stomach Cancer.

| Name of guidelines<br>( Year of guideline publication),<br>Country of origin of the guideline                         | Name of recommended vaccines,<br>Strength of recommendation (strong/moderate/weak/not stated)                                                                           | Details of recommendation for each vaccine                        |                                                     |                                                                                                                                                                                                                                                                                                                                                           |
|-----------------------------------------------------------------------------------------------------------------------|-------------------------------------------------------------------------------------------------------------------------------------------------------------------------|-------------------------------------------------------------------|-----------------------------------------------------|-----------------------------------------------------------------------------------------------------------------------------------------------------------------------------------------------------------------------------------------------------------------------------------------------------------------------------------------------------------|
|                                                                                                                       |                                                                                                                                                                         | Specific indications (age, severity of disease, disease subgroup) | Specific contraindications and harms (side effects) | Vaccine administration (timing, route, dosage) and storage details                                                                                                                                                                                                                                                                                        |
| Family Practice Oncology Network (FPON): Clinical practice guidelines on upper gastrointestinal cancer (2016), Canada | Influenza,<br>Strength of recommendation: Not stated                                                                                                                    | For gastric lymphoma                                              | Not mentioned                                       | Timing: Yearly in autumn<br>Route: Not mentioned<br>Dosage: Not mentioned<br>Storage: Not mentioned                                                                                                                                                                                                                                                       |
|                                                                                                                       | Pneumococcal,<br>Strength of recommendation: Not stated                                                                                                                 | For gastric lymphoma                                              | Not mentioned                                       | Timing: To be given at least 2 weeks before initiation of anti-lymphoid cancer treatment, repeat again after 5 years later<br>Route: Not mentioned<br>Dosage: Not mentioned<br>Storage: Not mentioned<br>Special consideration: Delay until at least 6 months after completion of all lymphoid cancer treatment and any other immunosuppressive treatment |
|                                                                                                                       | Tetanus/ Diphtheria,<br>Strength of recommendation: Not stated                                                                                                          | For gastric lymphoma                                              | Not mentioned                                       | Timing: Every 10 years<br>Route: Not mentioned<br>Dosage: Not mentioned<br>Storage: Not mentioned                                                                                                                                                                                                                                                         |
|                                                                                                                       | Meningococcal C Conjugate + Meningococcal Quadrivalent Conjugate (A,C,Y,W-135) + Haemophilus Influenzae Type b (HiB) Vaccine,<br>Strength of recommendation: Not stated | For gastric lymphoma                                              | Not mentioned                                       | Timing:<br>- If the spleen is to be or was removed or treated with radiation, give all 3 at least 2 weeks before splenectomy or if spleen is already removed, give as soon as possible after splenectomy.<br>- Repeat every 5 years<br><br>Route: Not mentioned                                                                                           |

|                                                                                                              |                                                                            |                                           |                                                                                                                      |                                                                                                                                                                                                                                                                                                                  |
|--------------------------------------------------------------------------------------------------------------|----------------------------------------------------------------------------|-------------------------------------------|----------------------------------------------------------------------------------------------------------------------|------------------------------------------------------------------------------------------------------------------------------------------------------------------------------------------------------------------------------------------------------------------------------------------------------------------|
|                                                                                                              |                                                                            |                                           |                                                                                                                      | Dosage: Not mentioned<br>Storage: Not mentioned                                                                                                                                                                                                                                                                  |
|                                                                                                              | Polio vaccine ,<br>Strength of recommendation:<br>Not stated               | For gastric lymphoma                      | Contraindication:<br>Oral polio vaccine contraindicated in patients with lymphoid cancer<br><br>Harms: Not mentioned | Timing: Every 10 years<br>Route: Intramuscular<br>Dosage: Not mentioned<br>Storage: Not mentioned                                                                                                                                                                                                                |
|                                                                                                              | Varicella Zoster,<br>Strength of recommendation:<br>Not stated             | For gastric lymphoma                      | Not mentioned                                                                                                        | Timing: At least 2 weeks before initiation of anti-lymphoid cancer treatment<br>Route: Intramuscular<br>Dosage: Not mentioned<br>Storage: Not mentioned<br>Special consideration: If cannot be given before, delay until 6 months after completion of all lymphoid cancer treatment/ immunosuppressive treatment |
| Indian Council of Medical Research (ICMR): Consensus document for management of gastric cancer (2014), India | Influenza ,<br>Strength of recommendation:<br>Not stated                   | Not mentioned                             | Not mentioned                                                                                                        | Not mentioned                                                                                                                                                                                                                                                                                                    |
|                                                                                                              | Haemophilus Influenza Type B,<br>Strength of recommendation:<br>Not stated | If patient did not receive during infancy | Not mentioned                                                                                                        | Not mentioned                                                                                                                                                                                                                                                                                                    |
|                                                                                                              | Meningococcal,<br>Strength of recommendation:<br>Not stated                | Patients > 2 years                        | Not mentioned                                                                                                        | Timing: One-time vaccination<br>Route: Intramuscular<br>Dosage: Not mentioned<br>Storage: Not mentioned                                                                                                                                                                                                          |
|                                                                                                              | Pneumococcal ,<br>Strength of recommendation:<br>Not stated                | Patients > 2 years                        | Not mentioned                                                                                                        | Timing: - Administered at least 2-3 weeks pre-operation<br>- Administer again 5 years after splenectomy<br>Route: Intramuscular<br>Dosage: Not mentioned<br>Storage: Not mentioned                                                                                                                               |

#### Other diseases

**Table S9.** Summary of vaccination recommendation for Diabetes.

| Name of guidelines<br>( Year of guideline publication),<br>Country of origin of the guideline | Name of recommended vaccines,<br>Strength of recommendation (strong/moderate/weak/not stated) | Details of recommendation for each vaccine                       |                                                     |                                                                    |
|-----------------------------------------------------------------------------------------------|-----------------------------------------------------------------------------------------------|------------------------------------------------------------------|-----------------------------------------------------|--------------------------------------------------------------------|
|                                                                                               |                                                                                               | Specific indications (age,severity of disease, disease subgroup) | Specific contraindications and harms (side effects) | Vaccine administration (timing, route, dosage) and storage details |

|                                                                                                                               |                                                                                        |                                                                                                                 |               |                                                                                                                                                                                                                                                                           |
|-------------------------------------------------------------------------------------------------------------------------------|----------------------------------------------------------------------------------------|-----------------------------------------------------------------------------------------------------------------|---------------|---------------------------------------------------------------------------------------------------------------------------------------------------------------------------------------------------------------------------------------------------------------------------|
| IDF: Global guideline for managing older people with type 2 diabetes (2013, updated 2017), International                      | Seasonal influenza vaccine,<br>Strength of recommendation:<br>Not stated               | All older people with diabetes                                                                                  | Not mentioned | Not mentioned                                                                                                                                                                                                                                                             |
| Diabetes Canada: Guidelines (2018), Canada                                                                                    | Influenza vaccine,<br>Strength of recommendation:<br>Not stated                        | People with Diabetes                                                                                            | Not mentioned | Timing: Annual<br>Route: Not mentioned<br>Dosage: Not mentioned<br>Storage: Not mentioned                                                                                                                                                                                 |
|                                                                                                                               | Pneumococcal vaccine,<br>Strength of recommendation:<br>Not stated                     | Persons with diabetes aged 19 to 64 years                                                                       | Not mentioned | Timing:<br>- Vaccinate Pneu-P-23 at diagnosis<br>- 1-time revaccination is recommended for those $\geq 65$ years of age (if the original vaccine was given when they were $< 65$ years of age)<br>Route: Not mentioned<br>Dosage: Not mentioned<br>Storage: Not mentioned |
|                                                                                                                               |                                                                                        | For people with diabetes $\geq 65$ years or with an immunocompromising condition (e.g. end stage renal disease) |               | Timing:<br>- Pneu-C-13 vaccine administered first<br>- followed at least 8 weeks later by Pneu-P-23 vaccine<br>Route: Not mentioned<br>Dosage: Not mentioned<br>Storage: Not mentioned                                                                                    |
|                                                                                                                               |                                                                                        |                                                                                                                 |               |                                                                                                                                                                                                                                                                           |
| American Association of Clinical Endocrinology Clinical Practice Guideline: Developing a Diabetes Mellitus Comprehensive Care | Influenza vaccine: IIV4 or RIV4 or LAIV,<br>Strength of recommendation:<br>Very strong | Persons with Diabetes who are $\geq 6$ months old                                                               | Not mentioned | Timing: Annual<br>Route: Not mentioned<br>Dosage: Not mentioned<br>Storage: Not mentioned                                                                                                                                                                                 |
|                                                                                                                               | Pneumococcal<br>PCV15 and PCV20,                                                       | Persons with Diabetes aged 19-64 years old                                                                      | Not mentioned | Timing:<br>-When PCV15 is used, PPSV23 should be                                                                                                                                                                                                                          |

|                   |                                                            |                                                                    |               |                                                                                                                                                                                                                                                                                                             |
|-------------------|------------------------------------------------------------|--------------------------------------------------------------------|---------------|-------------------------------------------------------------------------------------------------------------------------------------------------------------------------------------------------------------------------------------------------------------------------------------------------------------|
| Plan— 2022 Update | Strength of recommendation:<br>Strong                      |                                                                    |               | administered at least 12 months following the dose of PCV15<br>-A minimum interval of 8 weeks may be used for adults with immunocompromising conditions<br>Route: Not mentioned<br>Dosage: Not mentioned<br>Storage: Not mentioned                                                                          |
|                   |                                                            | ≥65 years old                                                      |               | Timing:<br>-For adults ≥ 65 years old and who have not previously received PCV or whose vaccination history is unknown, PCV15 or PCV20 should be administered.<br>-When PCV15 is used, it should be followed by a dose of PPSV23<br>Route: Not mentioned<br>Dosage: Not mentioned<br>Storage: Not mentioned |
|                   | Hepatitis B,<br>Strength of recommendation:<br>Very strong | Persons with Diabetes ≤59 years                                    | Not mentioned | Timing: At diagnosis<br>Route: Not mentioned<br>Dosage: Not mentioned<br>Storage: Not mentioned                                                                                                                                                                                                             |
|                   | Hepatitis B,<br>Strength of recommendation:<br>Not strong  | Based on risk and quality of immune response for adults aged ≥60 y |               | Not mentioned                                                                                                                                                                                                                                                                                               |
|                   | Tdap,<br>Strength of recommendation:<br>Not strong         | -                                                                  | Not mentioned | Timing: Every 10 years following completion of the primary series in routine childhood vaccination<br>Route: Not mentioned                                                                                                                                                                                  |
|                   |                                                            |                                                                    |               |                                                                                                                                                                                                                                                                                                             |

|                                                                                                                                                                                                |                                                                                 |                                                                                                                 |                                                               |                                                                                                                                                                                                                     |                                                                                                                                                                        |
|------------------------------------------------------------------------------------------------------------------------------------------------------------------------------------------------|---------------------------------------------------------------------------------|-----------------------------------------------------------------------------------------------------------------|---------------------------------------------------------------|---------------------------------------------------------------------------------------------------------------------------------------------------------------------------------------------------------------------|------------------------------------------------------------------------------------------------------------------------------------------------------------------------|
|                                                                                                                                                                                                |                                                                                 |                                                                                                                 |                                                               |                                                                                                                                                                                                                     | Dosage: Not mentioned<br>Storage: Not mentioned                                                                                                                        |
|                                                                                                                                                                                                | COVID-19,<br>Strength of recommendation:<br>Strong                              |                                                                                                                 | All persons per FDA approval or emergency use authorization   | Not mentioned                                                                                                                                                                                                       | Not mentioned                                                                                                                                                          |
|                                                                                                                                                                                                | Recombinant zoster vaccine (RZV),<br>Strength of recommendation:<br>Very strong |                                                                                                                 | All adults aged ≥50 years old                                 | Not mentioned                                                                                                                                                                                                       | Not mentioned                                                                                                                                                          |
| Joint British Diabetes Societies for Inpatient Care (JBDS-IP): Clinical guideline on inpatient care of the frail older adult with diabetes (2022), United Kingdom                              | Influenza vaccine,<br>Strength of recommendation:<br>Not stated                 |                                                                                                                 | Older frail individuals with diabetes living in the community | Not mentioned                                                                                                                                                                                                       | Not mentioned                                                                                                                                                          |
|                                                                                                                                                                                                | Pneumococcal vaccine,<br>Strength of recommendation:<br>Not stated              |                                                                                                                 | Older frail individuals with diabetes living in the community | Not mentioned                                                                                                                                                                                                       | Not mentioned                                                                                                                                                          |
|                                                                                                                                                                                                | Herpes Zoster vaccine,<br>Strength of recommendation:<br>Not stated             |                                                                                                                 | Older frail individuals with diabetes living in the community | Not mentioned                                                                                                                                                                                                       | Not mentioned                                                                                                                                                          |
| Research Society for the Study of Diabetes in India (RSSDI)- Endocrine Society of India (ESI): Clinical practice recommendations for the management of type 2 diabetes mellitus (2020) , India | Quadrivalent influenza vaccine,<br>Strength of recommendation:<br>Not stated    |                                                                                                                 | All patients with T2DM with age ≥6 months                     | Contraindications:<br>- Egg allergy<br><br>- Recent history of Guillain-Barre syndrome within six weeks of a previous influenza vaccination<br><br>- Febrile illness or any acute infection<br>Harms: Not mentioned | Timing: Annual<br>Route: Not mentioned<br>Dosage: Not mentioned<br>Storage: Not mentioned                                                                              |
|                                                                                                                                                                                                | Pneumococcal vaccine (either PCV13 with PPSV23 or only PPSV23)                  | 13-valent pneumococcal conjugate vaccine (PCV13) followed by PPSV23,<br>Strength of recommendation : Not stated | DM patients >50 years                                         | Contraindications:<br>- Hypersensitivity to the active substances or to any of the excipients of the vaccine<br><br>- Febrile illness or any acute infection<br>Harms: Not mentioned                                | Timing: PCV13 vaccination should be followed up with a dose of PPSV23 at least 1 year later<br>Route: Not mentioned<br>Dosage: Not mentioned<br>Storage: Not mentioned |
|                                                                                                                                                                                                |                                                                                 | Only 23-valent pneumococcal polysaccharide vaccine (PPSV23),                                                    | All patients with T2DM                                        | Contraindications:<br>- Hypersensitivity to the active substances or to any of the                                                                                                                                  | Timing:<br>- ≤64 years old: receive PPSV23 at diagnosis<br>- ≥ 65 years old:                                                                                           |



|  |                                                                                      |                                         |                                         |                                                                                                  |                                                                                                                                                                                            |
|--|--------------------------------------------------------------------------------------|-----------------------------------------|-----------------------------------------|--------------------------------------------------------------------------------------------------|--------------------------------------------------------------------------------------------------------------------------------------------------------------------------------------------|
|  |                                                                                      | Strength of recommendation : Not stated |                                         | excipients of the vaccine<br><br>-Febrile illness or any acute infection<br>Harms: Not mentioned | receive another PPSV23<br>- second dose of PPSV23 must be at least 5 years apart from the previous dose of PPSV<br>Route: Not mentioned<br>Dosage: Not mentioned<br>Storage: Not mentioned |
|  | Hepatitis B Virus vaccine (3 dose series),<br>Strength of recommendation: Not stated |                                         | All unvaccinated patients with diabetes | Not mentioned                                                                                    | Not mentioned                                                                                                                                                                              |
|  | Td/Tap,<br>Strength of recommendation: Not stated                                    |                                         | Diabetic patients                       | Not mentioned                                                                                    | Timing: Substitute one time dose of Tdap; then boost with Td every 10 years<br>Route: Not mentioned<br>Dosage: Not mentioned<br>Storage: Not mentioned                                     |
|  | MMR (Measles mumps rubella),<br>Strength of recommendation: Not stated               |                                         | Diabetic patients                       | Not mentioned                                                                                    | Timing: 1 or 2 doses 4 weeks interval<br>Route: Not mentioned<br>Dosage: Not mentioned<br>Storage: Not mentioned                                                                           |
|  | Varicella,<br>Strength of recommendation: Not stated                                 |                                         | Diabetic patients                       | Not mentioned                                                                                    | Timing: 2 doses, at least 4 weeks apart<br>Route: Not mentioned<br>Dosage: Not mentioned<br>Storage: Not mentioned                                                                         |
|  | Zoster,<br>Strength of recommendation: Not stated                                    |                                         | Diabetic patients                       | Not mentioned                                                                                    | Timing 1 dose at 60 years old<br>Route: Not mentioned<br>Dosage: Not mentioned<br>Storage: Not mentioned                                                                                   |
|  | Hepatitis A,<br>Strength of recommendation: Not stated                               |                                         | Diabetic patients                       | Not mentioned                                                                                    | Timing: 2 doses at least 6 months apart<br>Route: Not                                                                                                                                      |

|                                                                                                                                                                           |                                                                              |                                                                                      |               |                                                                                                                                                                                                                                                                                                            |
|---------------------------------------------------------------------------------------------------------------------------------------------------------------------------|------------------------------------------------------------------------------|--------------------------------------------------------------------------------------|---------------|------------------------------------------------------------------------------------------------------------------------------------------------------------------------------------------------------------------------------------------------------------------------------------------------------------|
|                                                                                                                                                                           |                                                                              |                                                                                      |               | mentioned<br>Dosage: Not mentioned<br>Storage: Not mentioned                                                                                                                                                                                                                                               |
|                                                                                                                                                                           | HPV (Human papillomavirus),<br>Strength of recommendation:<br>Not stated     | Females, diabetic patients                                                           | Not mentioned | Timing:<br>-3 doses through age 26 years<br>-The second dose should be administered 1-2 months after the first dose<br>-Third dose should be administered 6 months after the first dose (at least 24 weeks after the first dose<br>Route: Not mentioned<br>Dosage: Not mentioned<br>Storage: Not mentioned |
|                                                                                                                                                                           |                                                                              | Male, diabetic patients                                                              | Not mentioned | Timing: 3 doses through age 21 years<br>Route: Not mentioned<br>Dosage: Not mentioned<br>Storage: Not mentioned                                                                                                                                                                                            |
| Royal Australian College of General Practitioners (RACGP):<br>Management of type 2 diabetes – A handbook for general practice (2020, updated 2021), Australia-New Zealand | Influenza vaccine,<br>Strength of recommendation:<br>Not stated              | All patients with T2DM                                                               | Not mentioned | Timing: Annual<br>Route: Not mentioned<br>Dosage: Not mentioned<br>Storage: Not mentioned                                                                                                                                                                                                                  |
|                                                                                                                                                                           | Diphtheria, tetanus, pertussis,<br>Strength of recommendation:<br>Not stated | All patients with T2DM, aged ≥65 years if they have not had one in the past 10 years | Not mentioned | Not mentioned                                                                                                                                                                                                                                                                                              |
|                                                                                                                                                                           | Hepatitis B,<br>Strength of recommendation:<br>Not stated                    | T2DM patients who are travelling to hepatitis B–endemic areas                        | Not mentioned | Not mentioned                                                                                                                                                                                                                                                                                              |
|                                                                                                                                                                           | Herpes zoster ,<br>Strength of recommendation:<br>Not stated                 | T2DM patients age 70–79 years old                                                    | Not mentioned | Not mentioned                                                                                                                                                                                                                                                                                              |
|                                                                                                                                                                           | Pneumococcal vaccine ( 23-valent pneumococcal                                | All adults with T2DM                                                                 | Not mentioned | Timing:<br>- First dose at                                                                                                                                                                                                                                                                                 |

|                                                                                                                                      |                                                                               |                                   |               |                                                                                                                                                                                                                                                                                             |
|--------------------------------------------------------------------------------------------------------------------------------------|-------------------------------------------------------------------------------|-----------------------------------|---------------|---------------------------------------------------------------------------------------------------------------------------------------------------------------------------------------------------------------------------------------------------------------------------------------------|
|                                                                                                                                      | polysaccharide vaccine (23vPPV),<br>Strength of recommendation:<br>Not stated |                                   |               | around age 18 years,<br>or at time of<br>diagnosis of type 2<br>diabetes<br>- Second dose 5–10<br>years later<br>-Third dose at least<br>five years later or at<br>age 65 years,<br>whichever is later.<br>Route: Not<br>mentioned<br>Dosage: Not<br>mentioned<br>Storage: Not<br>mentioned |
| Japanese<br>Diabetes Society<br>(JDS): Japanese<br>clinical practice<br>guideline for<br>diabetes 2019<br>(published 2020),<br>Japan | Influenza vaccine,<br>Strength of recommendation:<br>Weak                     | Elderly patients with<br>diabetes | Not mentioned | Not mentioned                                                                                                                                                                                                                                                                               |
|                                                                                                                                      | Pneumococcal vaccine<br>Strength of recommendation:<br>Weak                   | Elderly patients with<br>diabetes | Not mentioned | Not mentioned                                                                                                                                                                                                                                                                               |

**Table S10.** Summary of vaccination recommendation for CKD.

| Name of guidelines<br>( Year of guideline publication),<br>Country of origin of the guideline                                                              | Name of recommended vaccines,<br>Strength of recommendation<br>(strong/moderate/weak/not stated) | Details of recommendation for each vaccine                                                        |                                                     |                                                                                           |
|------------------------------------------------------------------------------------------------------------------------------------------------------------|--------------------------------------------------------------------------------------------------|---------------------------------------------------------------------------------------------------|-----------------------------------------------------|-------------------------------------------------------------------------------------------|
|                                                                                                                                                            |                                                                                                  | Specific indications<br>(age, severity of disease, disease subgroup)                              | Specific contraindications and harms (side effects) | Vaccine administration<br>(timing, route, dosage) and storage details                     |
| KDIGO: Clinical practice guideline for the prevention, diagnosis, evaluation, and treatment of hepatitis C in chronic kidney disease (2018), International | Hepatitis A & B Vaccines<br>Strength of recommendation: Level 1<br>strength of recommendation    | History of HCV infection (whether NAT-positive or not)                                            | Not mentioned                                       | Not mentioned                                                                             |
| KDIGO: Clinical practice guideline for the evaluation and management of chronic kidney disease, 2012 (2013), International                                 | Influenza,<br>Strength of recommendation: Level 1<br>strength of recommendation                  | Adults with CKD                                                                                   | Not mentioned                                       | Timing: Annual<br>Route: Not mentioned<br>Dosage: Not mentioned<br>Storage: Not mentioned |
|                                                                                                                                                            | Polyvalent Pneumococcal Vaccine,<br>Strength of recommendation: Level 1                          | eGFR <30 ml/min/1.73 m <sup>2</sup> (GFR categories G4-G5) and those at high risk of pneumococcal | Not mentioned                                       | Timing: Revaccination within 5 years<br>Route: Not mentioned<br>Dosage: Not mentioned     |

|                                                                                                                                                                                     |                                                                             |                                                                                                                                                                                                                  |                                                                                          |                                                                                                                                                                                                                                                                                                                                                                    |
|-------------------------------------------------------------------------------------------------------------------------------------------------------------------------------------|-----------------------------------------------------------------------------|------------------------------------------------------------------------------------------------------------------------------------------------------------------------------------------------------------------|------------------------------------------------------------------------------------------|--------------------------------------------------------------------------------------------------------------------------------------------------------------------------------------------------------------------------------------------------------------------------------------------------------------------------------------------------------------------|
|                                                                                                                                                                                     | strength of recommendation                                                  | infection (e.g., nephrotic syndrome, diabetes, or those receiving immunosuppression)                                                                                                                             |                                                                                          | Storage: Not mentioned                                                                                                                                                                                                                                                                                                                                             |
|                                                                                                                                                                                     | Hepatitis B, Strength of recommendation: Level 1 strength of recommendation | at high risk of progression of CKD and have GFR <30 ml/min/1.73 m <sup>2</sup> (GFR categories G4-G5)                                                                                                            | Not mentioned                                                                            | Not mentioned                                                                                                                                                                                                                                                                                                                                                      |
| Centers for Disease Control and Prevention (CDC): Guidelines for vaccinating kidney dialysis patients and patients with chronic kidney disease (2012, reviewed 2015), United States | DTaP/Tdap/Td, Strength of recommendation: Not stated                        | All adults                                                                                                                                                                                                       | Not mentioned                                                                            | Not mentioned                                                                                                                                                                                                                                                                                                                                                      |
|                                                                                                                                                                                     | Hepatitis B (Recombivax HB), Strength of recommendation: Not stated         | <ul style="list-style-type: none"> <li>- all susceptible chronic hemodialysis patients</li> <li>- pre-end-stage renal disease patients before they become dialysis dependent</li> <li>- ≥20 years old</li> </ul> | Not mentioned                                                                            | <p>Timing: Need for booster doses should be assessed by annual testing for antibody to hepatitis B surface antigen (anti-HBs). A booster dose should be administered when anti-HBs levels decline to &lt;10 mIU/mL</p> <p>Route: Not mentioned<br/>Dosage: administered in a 3 dose schedule (40 µg/mL)<br/>Storage: Not mentioned</p>                             |
|                                                                                                                                                                                     | Hepatitis B (two Engerix-B), Strength of recommendation: Not stated         |                                                                                                                                                                                                                  | Not mentioned                                                                            | <p>Timing: Need for booster doses should be assessed by annual testing for antibody to hepatitis B surface antigen (anti-HBs). A booster dose should be administered when anti-HBs levels decline to &lt;10 mIU/mL</p> <p>Route: Not mentioned<br/>Dosage: a 4 dose schedule, 20ug [1.0 mL doses] administered in 1 or 2 injections<br/>Storage: Not mentioned</p> |
|                                                                                                                                                                                     | Influenza (TIV), Strength of recommendation: Not stated                     | all persons aged ≥6 months                                                                                                                                                                                       | Contraindications: Live, attenuated Influenza vaccine is contraindicated in CKD patients | Not mentioned                                                                                                                                                                                                                                                                                                                                                      |

|  |                                                                                                   |                                                                                                                                                                                                                     |                      |                                                                                                                                                                                                                                                                                                                                                                                                                                                                                                                                                                                                                                                                                        |
|--|---------------------------------------------------------------------------------------------------|---------------------------------------------------------------------------------------------------------------------------------------------------------------------------------------------------------------------|----------------------|----------------------------------------------------------------------------------------------------------------------------------------------------------------------------------------------------------------------------------------------------------------------------------------------------------------------------------------------------------------------------------------------------------------------------------------------------------------------------------------------------------------------------------------------------------------------------------------------------------------------------------------------------------------------------------------|
|  |                                                                                                   |                                                                                                                                                                                                                     | Harms: Not mentioned |                                                                                                                                                                                                                                                                                                                                                                                                                                                                                                                                                                                                                                                                                        |
|  | MMR,<br>Strength of recommendation: Not stated                                                    | All adults                                                                                                                                                                                                          | Not mentioned        | Not mentioned                                                                                                                                                                                                                                                                                                                                                                                                                                                                                                                                                                                                                                                                          |
|  | 23-Valent Pneumococcal Polysaccharide Vaccine (PPSV23),<br>Strength of recommendation: Not stated | - all adults aged ≥65 years<br>- adults at high risk aged 19–64 years                                                                                                                                               | Not mentioned        | Timing: Revaccination within 5 years for persons with functional or anatomic asplenia and for immunocompromised persons<br>Route: Not mentioned<br>Dosage: Not mentioned<br>Storage: Not mentioned                                                                                                                                                                                                                                                                                                                                                                                                                                                                                     |
|  | 13-Valent Pneumococcal Conjugate Vaccine (PCV13) ,<br>Strength of recommendation: Not stated      | adults aged ≥19 years with immunocompromising conditions (including those with chronic renal failure or nephrotic syndrome), functional or anatomic asplenia, cerebrospinal fluid (CSF) leaks, or cochlear implants | Not mentioned        | Timing:<br>- receive a dose of PCV13 first, followed by a dose of PPSV23 at least 8 weeks later<br>- second PPSV23 dose is recommended 5 years after the first PPSV23 dose for persons aged 19–64 years with functional or anatomic asplenia and for persons with immunocompromising conditions<br>- those who received PPSV23 before age 65 years for any indication should receive another dose of the vaccine at age 65 years, or later if at least 5 years have elapsed since their previous PPSV23 dose<br>- adults aged ≥19 years with immunocompromising conditions, functional or anatomic asplenia, CSF leaks, or cochlear implants, who previously have received ≥1 doses of |

|                                                                                                                                                                                              |                                                                                                      |                                        |                                                                                                                                                                                                                                  |                                                                                                                                                                                                                                                                                                                                                                                                                                 |
|----------------------------------------------------------------------------------------------------------------------------------------------------------------------------------------------|------------------------------------------------------------------------------------------------------|----------------------------------------|----------------------------------------------------------------------------------------------------------------------------------------------------------------------------------------------------------------------------------|---------------------------------------------------------------------------------------------------------------------------------------------------------------------------------------------------------------------------------------------------------------------------------------------------------------------------------------------------------------------------------------------------------------------------------|
|                                                                                                                                                                                              |                                                                                                      |                                        |                                                                                                                                                                                                                                  | <p>PPSV23 should be given a PCV13 dose <math>\geq 1</math> year after the last PPSV23 dose was received</p> <ul style="list-style-type: none"> <li>- those who require additional doses of PPSV23, the first such dose should be given no sooner than 8 weeks after PCV13 and at least 5 years after the most recent dose of PPSV23</li> </ul> <p>Route: Not mentioned<br/>Dosage: Not mentioned<br/>Storage: Not mentioned</p> |
|                                                                                                                                                                                              | Varicella,<br>Strength of recommendation: Not stated                                                 | All adults                             | Not mentioned                                                                                                                                                                                                                    | Not mentioned                                                                                                                                                                                                                                                                                                                                                                                                                   |
| Department of Veterans Affairs (VA)/Department of Defense (DoD): Clinical practice guideline for the management of chronic kidney disease in primary care, 3rd edition (2014), United States | Influenza,<br>Strength of recommendation: Strong                                                     | CKD                                    | <p>Contraindications: Live vaccines, including nasal influenza (LAIV), may be contraindicated in patients with CKD and severe immunodeficiency including treatment with immunosuppressive agents</p> <p>Harms: Not mentioned</p> | Not mentioned                                                                                                                                                                                                                                                                                                                                                                                                                   |
|                                                                                                                                                                                              | Zoster /shingles,<br>Strength of recommendation: Strong                                              | CKD                                    |                                                                                                                                                                                                                                  |                                                                                                                                                                                                                                                                                                                                                                                                                                 |
|                                                                                                                                                                                              | Varicella ,<br>Strength of recommendation: Strong                                                    | CKD                                    |                                                                                                                                                                                                                                  |                                                                                                                                                                                                                                                                                                                                                                                                                                 |
|                                                                                                                                                                                              | MMR,<br>Strength of recommendation: Strong                                                           | CKD                                    |                                                                                                                                                                                                                                  |                                                                                                                                                                                                                                                                                                                                                                                                                                 |
|                                                                                                                                                                                              | Tdap,<br>Strength of recommendation: Strong                                                          | CKD                                    |                                                                                                                                                                                                                                  |                                                                                                                                                                                                                                                                                                                                                                                                                                 |
|                                                                                                                                                                                              | Pneumococcal polysaccharide vaccine (i.e., PCV 13 and PPSV23),<br>Strength of recommendation: Strong | CKD                                    | Not mentioned                                                                                                                                                                                                                    | Not mentioned                                                                                                                                                                                                                                                                                                                                                                                                                   |
|                                                                                                                                                                                              | Hepatitis B,<br>Strength of recommendation: Strong                                                   | CKD                                    | Not mentioned                                                                                                                                                                                                                    | Not mentioned                                                                                                                                                                                                                                                                                                                                                                                                                   |
| Kidney Health Australia (KHA): Chronic kidney disease (CKD)                                                                                                                                  | Influenza,<br>Strength of recommendation: Not stated                                                 | all people with diabetes and / or ESKD | Not mentioned                                                                                                                                                                                                                    | Not mentioned                                                                                                                                                                                                                                                                                                                                                                                                                   |

|                                                                                                                                                                                                     |                                                         |                                        |               |               |
|-----------------------------------------------------------------------------------------------------------------------------------------------------------------------------------------------------|---------------------------------------------------------|----------------------------------------|---------------|---------------|
| management in general practice – Guidelines and clinical tips to help identify, manage and refer patients with CKD in your practice, 3rd edition (2015), Australia-New ZealandAustralia-New Zealand | Pneumococcal,<br>Strength of recommendation: Not stated | all people with diabetes and / or ESKD | Not mentioned | Not mentioned |
| Japanese Society of Nephrology (JSN): Essential points from evidence-based clinical practice guideline for chronic kidney disease, 2018 (published 2019), Japan                                     | Influenza,<br>Strength of recommendation: Grade 2       | CKD                                    | Not mentioned | Not mentioned |
|                                                                                                                                                                                                     | Pneumococcal,<br>Strength of recommendation: Grade 2    | CKD                                    | Not mentioned | Not mentioned |

**Table S11.** Summary of vaccination recommendation for Stroke.

| Name of guidelines<br>( Year of guideline publication),<br>Country of origin of the guideline                                       | Name of recommended vaccines,<br>Strength of recommendation (strong/moderate/weak/not stated) | Details of recommendation for each vaccine                             |                                                     |                                                                                           |
|-------------------------------------------------------------------------------------------------------------------------------------|-----------------------------------------------------------------------------------------------|------------------------------------------------------------------------|-----------------------------------------------------|-------------------------------------------------------------------------------------------|
|                                                                                                                                     |                                                                                               | Specific indications (age, severity of disease, disease subgroup)      | Specific contraindications and harms (side effects) | Vaccine administration (timing, route, dosage) and storage details                        |
| HSFC: Canadian stroke best practice recommendations on secondary prevention of stroke (2017), Canada                                | Influenza<br>Strength of recommendation: Level B evidence from randomized controlled trials   | - Especially in patients with pre-existing cardiovascular risk factors | Not mentioned                                       | Not mentioned                                                                             |
| AHA: Scientific statement on self-care for the prevention and management of cardiovascular disease and stroke (2017), United States | Influenza,<br>Strength of recommendation: Not stated                                          | Not mentioned                                                          | Not mentioned                                       | Timing: Annual<br>Route: Not mentioned<br>Dosage: Not mentioned<br>Storage: Not mentioned |
| AHA/ASA: Guidelines for the primary prevention of stroke (2014),United States                                                       | Influenza,<br>Strength of recommendation: Moderate                                            | Not mentioned                                                          | Not mentioned                                       | Timing: Annual<br>Route: Not mentioned<br>Dosage: Not mentioned<br>Storage: Not mentioned |
